# Supplementary material for: The enhanced thermal stability and reduced hygroscopicity of aluminum hydride coated with vinyltrimethoxysilane
Source: Royal Society of Chemistry journal article supplement (doi:10.1039/d1nj05582h), 2021-12-09
Supplement: d1nj05582h1.pdf [file d1nj05582h1.pdf]

## Supplementary Material

### **The enhanced thermal stability and reduced hygroscopicity of aluminum hydride coated with Vinyltrimethoxysilane.**

Zhe Shi,<sup>a</sup> Taojie Lu,<sup>a</sup> Jian Zhang,<sup>\*a</sup> Zhaoyang Zhu,<sup>\*b</sup> Yidong Xu,<sup>a</sup> Debin Xia,<sup>a</sup> Yinghui Hu,<sup>a</sup> Kaifeng Lin,<sup>a</sup> and Yulin Yang<sup>\*a</sup>

<sup>a</sup> MIIT Key Laboratory of Critical Materials Technology for New Energy Conversion and Storage, School of Chemistry and Chemical Engineering, Harbin Institute of Technology, Harbin 150001, P. R. China.

<sup>b</sup> Science and Technology on Aerospace Chemical Power Laboratory, Hubei Institute of Aerospace Chemotechnology, Xiangyang, 441003, Hubei, China.

\* Corresponding author. <sup>a</sup> MIIT Key Laboratory of Critical Materials Technology for New Energy Conversion and Storage, School of Chemistry and Chemical Engineering, Harbin Institute of Technology, Harbin 150001, P. R. China.

<sup>b</sup> Science and Technology on Aerospace Chemical Power Laboratory, Hubei Institute of Aerospace Chemotechnology, Xiangyang, 441003, Hubei, China.

E-mail addresses: zhaji@hit.edu.cn (J. Zhang), zhuzhaoyang1101@163.com (Z. Y. Zhu), ylyang@hit.edu.cn (Y.L. Yang).

## Table of Contents

|                                                                                                                                                                                                                                                    |            |
|----------------------------------------------------------------------------------------------------------------------------------------------------------------------------------------------------------------------------------------------------|------------|
| <b>Section 1. The reaction mechanism of <math>\alpha</math>-AlH<sub>3</sub> with A171 and the surface atomic content and XPS full spectrum of <math>\alpha</math>-AlH<sub>3</sub> and <math>\alpha</math>-AlH<sub>3</sub>@A171 composite .....</b> | <b>S-3</b> |
| <b>Section 2. SEM images and size distribution of <math>\alpha</math>-AlH<sub>3</sub> and <math>\alpha</math>-AlH<sub>3</sub>@A171 composites .....</b>                                                                                            | <b>S-4</b> |
| <b>Section 3. TEM image of <math>\alpha</math>-AlH<sub>3</sub> and <math>\alpha</math>-AlH<sub>3</sub>@A171 composite .....</b>                                                                                                                    | <b>S-5</b> |
| <b>Section 4. EDS mapping of Al, Si, C, and O in <math>\alpha</math>-AlH<sub>3</sub>.....</b>                                                                                                                                                      | <b>S-6</b> |
| <b>Section 5. TG/DSC curves of <math>\alpha</math>-AlH<sub>3</sub>.....</b>                                                                                                                                                                        | <b>S-7</b> |
| <b>Section 6. Photographs of <math>\alpha</math>-AlH<sub>3</sub> and <math>\alpha</math>-AlH<sub>3</sub>@A171 composite before hygroscopicity .....</b>                                                                                            | <b>S-8</b> |
| <b>Section 7. Photographs of <math>\alpha</math> -AlH<sub>3</sub> and <math>\alpha</math>-AlH<sub>3</sub>@A171 composite were placed in water for 30 min.....</b>                                                                                  | <b>S-9</b> |

**Section 1. The reaction mechanism of  $\alpha$ -AlH<sub>3</sub> with A171 and the surface atomic content and XPS full spectrum of  $\alpha$ -AlH<sub>3</sub> and  $\alpha$ -AlH<sub>3</sub>@A171 composite.**

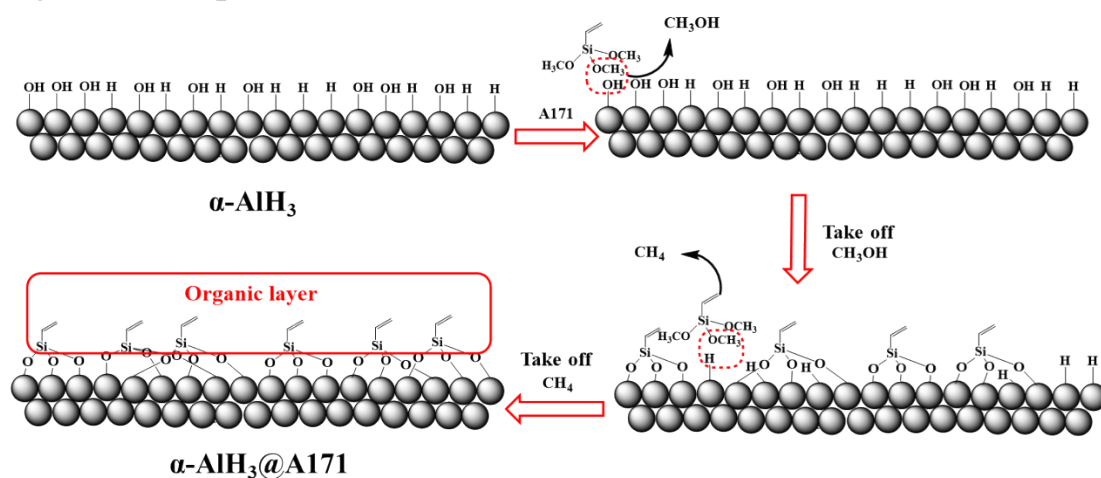

**Fig. S1** Reaction process of A171 with  $\alpha$ -AlH<sub>3</sub> surface and formation of organic layer.

**Table S1** The XPS analysis of the specific atomic content of C, O, Al and, Si elements in the  $\alpha$ -AlH<sub>3</sub> and  $\alpha$ -AlH<sub>3</sub>@A171 composite.

|                                  | C element<br>(atomic content<br>%) | O element<br>(atomic<br>content %) | Al element<br>(atomic<br>content %) | Si element<br>(atomic content<br>%) |
|----------------------------------|------------------------------------|------------------------------------|-------------------------------------|-------------------------------------|
| $\alpha$ -AlH <sub>3</sub>       | 1.55                               | 54.34                              | 44.41                               | 0                                   |
| $\alpha$ -AlH <sub>3</sub> @A171 | 26.22                              | 38.54                              | 26.35                               | 8.89                                |

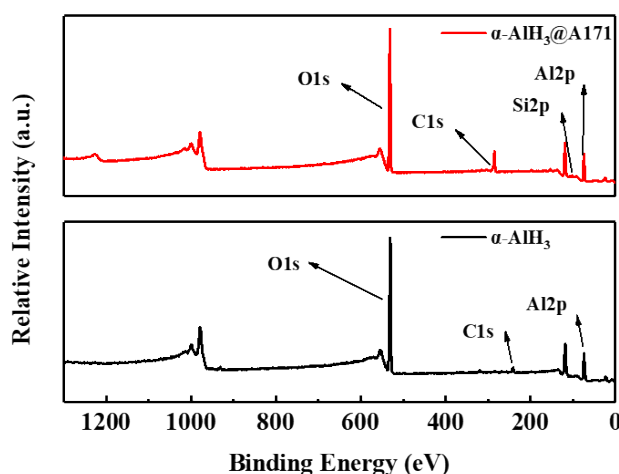

**Fig. S2** The XPS full spectrum of the  $\alpha$ -AlH<sub>3</sub> and  $\alpha$ -AlH<sub>3</sub>@A171 composite.

**Section 2. SEM images and size distribution of  $\alpha$ -AlH<sub>3</sub> and  $\alpha$ -AlH<sub>3</sub>@A171 composite.**

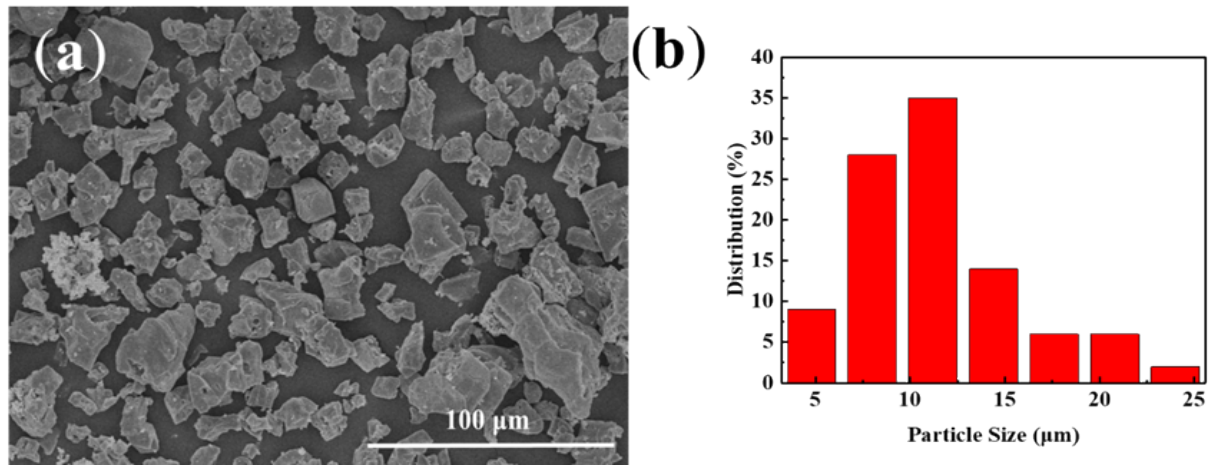

**Fig. S3** SEM image (a) and size distribution (b) of  $\alpha$ -AlH<sub>3</sub>.

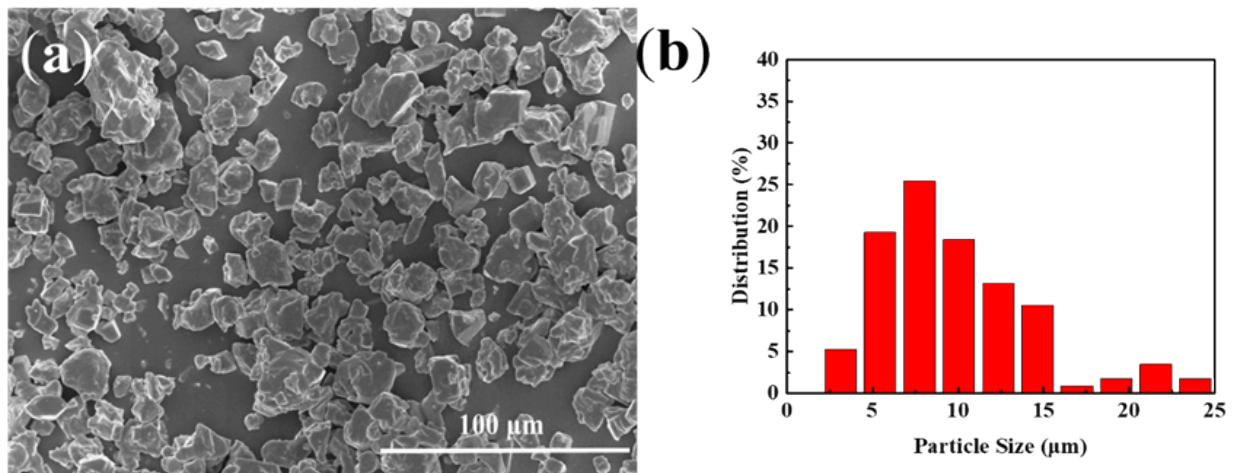

**Fig. S4** SEM image (a) and size distribution (b) of  $\alpha$ -AlH<sub>3</sub>@A171 composite.

**Section 3. TEM image of  $\alpha$ -AlH<sub>3</sub> and  $\alpha$ -AlH<sub>3</sub>@A171 composite.**

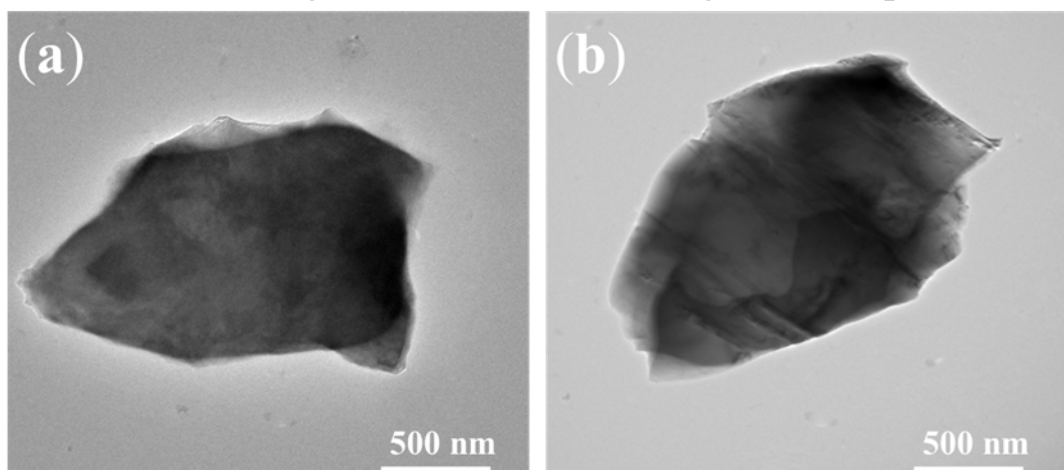

**Fig. S5** TEM image of  $\alpha$ -AlH<sub>3</sub> (a) and  $\alpha$ -AlH<sub>3</sub>@A171 composite (b).

**Section 4. EDS mapping of Al, Si, C and O in  $\alpha$ -AlH<sub>3</sub>.**

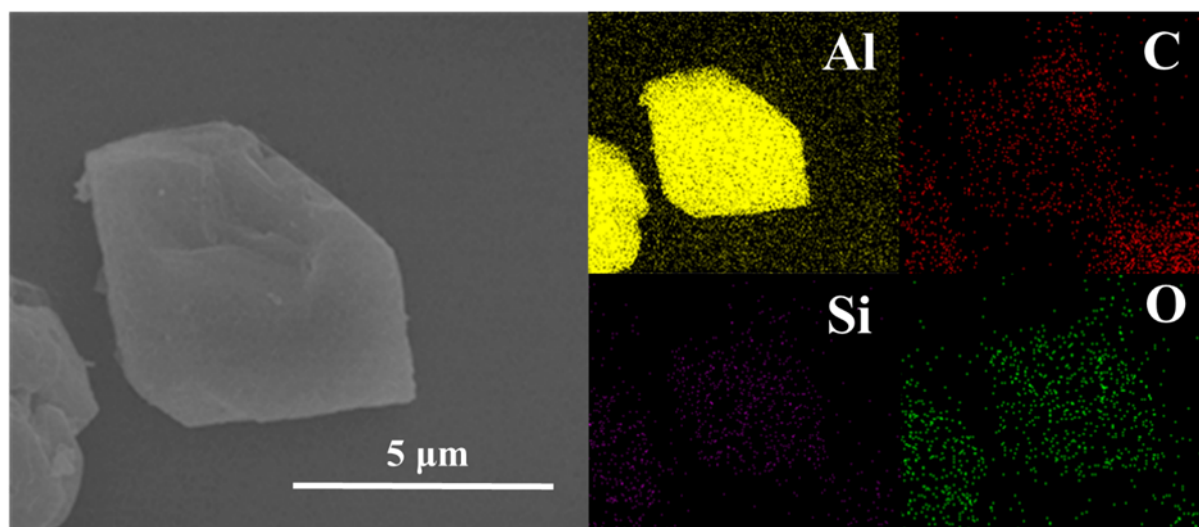

**Fig. S6** EDS mapping of Al, Si, C, and O in  $\alpha$ -AlH<sub>3</sub>.

## Section 5. TG/DSC curves of $\alpha$ -AlH<sub>3</sub>.

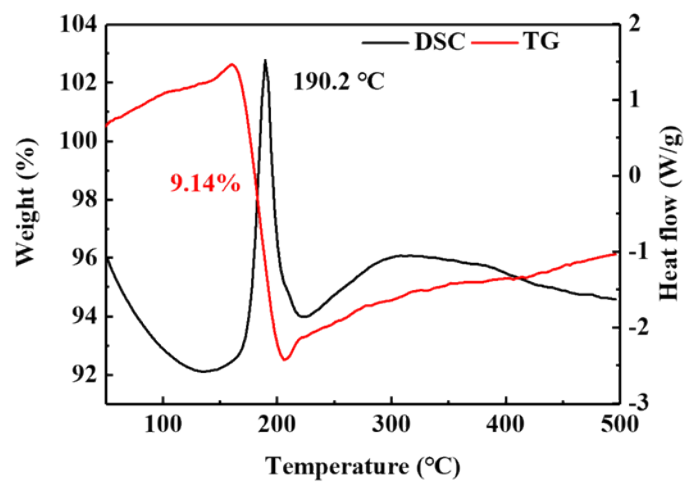

**Fig. S7** TG/DSC curves of the  $\alpha$ -AlH<sub>3</sub>.

**Section 6. Photographs of  $\alpha$ -AlH<sub>3</sub> and  $\alpha$ -AlH<sub>3</sub>@A171 composite before hygroscopicity.**

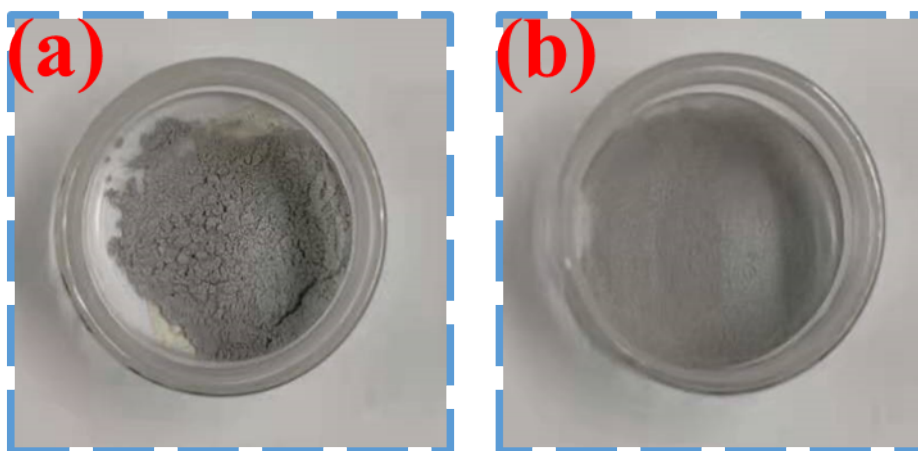

**Fig. S8** Morphology before the moisture absorption of the  $\alpha$ -AlH<sub>3</sub> and  $\alpha$ -AlH<sub>3</sub>@A171 (30 °C, RH 80%).



Section 7. Photographs of  $\alpha$ -AlH<sub>3</sub> and  $\alpha$ -AlH<sub>3</sub>@A171 composite were placed in water for 30 min.

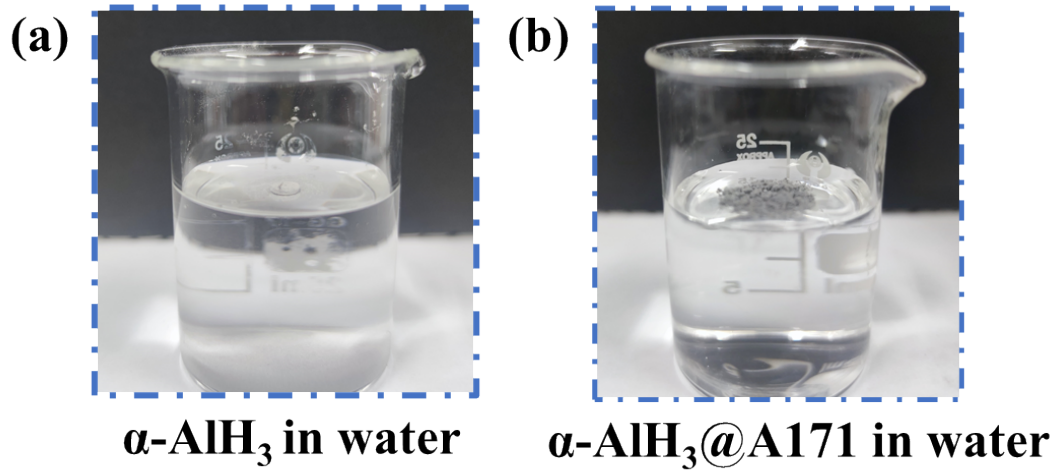

Fig. S9 Photographs of the  $\alpha$ -AlH<sub>3</sub> and  $\alpha$ -AlH<sub>3</sub>@A171 were placed in water (25 °C) for 30 min.
